# Supplementary material for: Morphology and Histology of the Orbital Region and Eye of the Asiatic Black Bear (Ursus thibetanus)—Similarities and Differences within the Caniformia Suborder
Source: MDPI journal article supplement (doi:10.3390/ani12070801), 2022-03-22
Supplement: s1 [file s1]

**Table S1**

Review of the morphological analysis of orbital region, eye tunics, eyelids and orbital glands of the Caniformia suborder.

| Infraorder | Parvordo | Family  | Species                          | Skull with orbital region | Eye tunics                     | Upper and lower eyelids | Superficial gland of the third eyelid with third eyelid | Deep gland of the third eyelid | Lacrimial gland | Reference                                                         |
|------------|----------|---------|----------------------------------|---------------------------|--------------------------------|-------------------------|---------------------------------------------------------|--------------------------------|-----------------|-------------------------------------------------------------------|
| Canoidea   |          | Canidae | <i>Canis familiaris</i>          | +                         | +                              | +                       | +                                                       | A                              | +               | [24,84,85,86,107,111,113,135,143,150,151,152,158,165-168,170-174] |
|            |          |         | <i>Cerdocyon thous</i>           | +                         | +<br>AED, CD<br>TeED           | +                       | +                                                       |                                | +               | [25,67,87,97,175]                                                 |
|            |          |         | <i>Chrysocyon<br/>brachyurus</i> |                           | +                              | +                       | +                                                       |                                |                 | [97]                                                              |
|            |          |         | <i>Canis lupus</i>               | +                         | +<br>cornea<br>AED, CD<br>TeED |                         |                                                         |                                |                 |                                                                   |
|            |          |         | <i>Canis dingo</i>               |                           | +                              |                         |                                                         |                                |                 | [25,66,84,86]                                                     |
|            |          |         | <i>Vulpes corsac</i>             |                           | +<br>cornea                    |                         |                                                         |                                |                 | [84,86]                                                           |

|  |  |  |                                     |   |                                              |   |   |   |   |                                  |
|--|--|--|-------------------------------------|---|----------------------------------------------|---|---|---|---|----------------------------------|
|  |  |  | <i>Vulpes vulpes</i>                |   | +<br>lens pupil<br>retina<br>AED,<br>CD,TeEd |   |   |   |   | [84,86]<br><br>[25,66,69,96,115] |
|  |  |  | <i>Vuples lagopus</i>               |   | +<br>retina<br>AED, CD<br>TeED               |   |   |   |   | [25,115]                         |
|  |  |  | <i>Canis lupus</i>                  |   | +<br>AED                                     |   |   |   |   | [66]                             |
|  |  |  | <i>Canis lupus<br/>lupus</i>        |   | +<br>lens pupil                              |   |   |   |   | [96]                             |
|  |  |  | <i>Canis latrans</i>                | + | +                                            |   |   |   |   | [175]                            |
|  |  |  | <i>Canis rufus</i>                  | + | +                                            |   |   |   |   |                                  |
|  |  |  | <i>Lycaon pictus<br/>pictus</i>     | + | +                                            | + | + | A | + | [68]                             |
|  |  |  | <i>Lycalopex<br/>culpaesus</i>      | + |                                              |   |   |   |   | [176]                            |
|  |  |  | <i>Vulpes lagopus</i>               | + |                                              |   |   |   |   | [127]                            |
|  |  |  | <i>Nyctereutes<br/>procyonoides</i> | + |                                              |   |   |   |   | [130]                            |
|  |  |  | <i>Urocyon<br/>cinereoargenteus</i> |   | +<br>lens<br>AED, CD<br>TeED                 |   |   |   |   | [25,66,177]                      |
|  |  |  | <i>Speothos<br/>venaticus</i>       |   | +<br>AED, CD<br>TeED                         |   |   |   |   | [25]                             |

|           |        |         |                                |   |                                 |   |   |  |   |                     |
|-----------|--------|---------|--------------------------------|---|---------------------------------|---|---|--|---|---------------------|
|           |        |         | <i>Alopex lagopus</i>          |   | +<br>tapetum                    |   |   |  |   | [171]               |
| Arctoidea | Ursida | Ursidae | <i>Ursus arctos horribilis</i> | + | +                               |   |   |  |   | [26,178]            |
|           |        |         | <i>Melursus ursinus</i>        | + | +<br>AED, CD<br>TeED<br>tapetum |   |   |  |   | [25,32,33,178]      |
|           |        |         | <i>Ursus arctos</i>            | + | +<br>AED, CD<br>TeED            |   |   |  |   | [25,28,29,30,31,66] |
|           |        |         | <i>Ursus americanus</i>        |   | +<br>retina<br>AED, CD<br>TeED  |   |   |  |   | [23,25,66]          |
|           |        |         | <i>Ursus maritimus</i>         |   | +<br>retina                     |   |   |  |   |                     |
|           |        |         | <i>Selenarctos thibetanus</i>  |   | +<br>AED,<br>CD,<br>TeED        |   |   |  |   | [178]               |
|           |        |         | <i>Ursus malayanus</i>         |   | +<br>central<br>area            |   |   |  |   | [25]                |
|           |        |         |                                |   |                                 |   |   |  |   | [24]                |
|           |        |         | <i>Callorhinus ursinus</i>     |   | +<br>retina                     |   |   |  |   | [179]               |
|           |        |         | <i>Zalophus californianus</i>  |   | +                               | + | + |  | + | [91,104,139,180]    |

|  |            |           |                                 |   |   |   |  |   |                             |
|--|------------|-----------|---------------------------------|---|---|---|--|---|-----------------------------|
|  | Pinnipedia | Otariidae | <i>Phoca largha</i>             |   | + |   |  |   | [181]                       |
|  |            |           | <i>Eumetopias jubatus</i>       |   | + |   |  |   | [24,89]                     |
|  |            |           | <i>Arctocephalus pusillus</i>   |   | + |   |  |   | [89]                        |
|  |            |           |                                 | + | + |   |  |   | [75,83,119,121,131,138,182] |
|  | Odobenidae |           | <i>Odobenus rosmarus</i>        | + | + |   |  | + | [76,89,104,132,163,164]     |
|  |            |           |                                 | + | + |   |  | + | [75,83,131]                 |
|  | Phocidae   |           | <i>Leptonychotes weddellii</i>  |   | + | + |  |   | [92]                        |
|  |            |           | <i>Halichoerus grypus</i>       |   | + |   |  |   | [106]                       |
|  |            |           | <i>Pusa caspica</i>             |   | + |   |  |   | [116,118]                   |
|  |            |           | <i>Pusa sibirica</i>            |   | + |   |  |   | [89,116,181]                |
|  |            |           | <i>Pagophilus groenlandicus</i> |   | + |   |  |   | [116,117,122]               |
|  |            |           | <i>Cystophora cristata</i>      |   | + |   |  |   | [103,106,111]               |
|  |            |           | <i>Phoca vitulina</i>           |   | + |   |  |   | [72,182]                    |

|  |             |            |                                                       |                      |                          |  |   |  |      |                                        |
|--|-------------|------------|-------------------------------------------------------|----------------------|--------------------------|--|---|--|------|----------------------------------------|
|  |             |            | <i>Ommatophoca rossi</i>                              |                      | +                        |  |   |  |      | [24]<br>[133]                          |
|  |             |            | <i>Mirounga angustirostris</i><br><i>Mirounga sp.</i> | +                    | +                        |  | + |  |      | [180]<br>[104]<br>[75,131,181,182,183] |
|  | Musteloidea | Ailuridae  | <i>Ailuropoda melanoleuca</i>                         |                      | +<br>retina              |  |   |  |      | [100]                                  |
|  |             |            | <i>Ailurus fulgens</i>                                |                      | +<br>AED,<br>CD,<br>TeED |  |   |  | [25] |                                        |
|  |             | Mephitidae | <i>Mydaus sp.</i>                                     |                      | +<br>AED,<br>CD,<br>TeED |  |   |  |      | [25]                                   |
|  |             |            | <i>Meles meles</i>                                    | +<br>AED, CD<br>TeED |                          |  |   |  |      | [25,66,128,130]                        |
|  |             |            | <i>Martes foina</i>                                   | +                    |                          |  |   |  |      | [128]                                  |
|  |             |            | <i>Lutra lutra</i>                                    | +                    | +<br>AED<br>tapetum      |  |   |  |      | [24,69,128,129,184]                    |
|  |             |            | <i>Lutra annectens</i>                                |                      | +<br>AED, CD<br>TeED     |  |   |  |      | [25]                                   |

|  |  |            |                              |   |                                 |  |  |   |  |                   |
|--|--|------------|------------------------------|---|---------------------------------|--|--|---|--|-------------------|
|  |  | Mustelidae | <i>Lutra marculicollis</i>   |   | +<br>AED, CD<br>TeED            |  |  |   |  | [25]              |
|  |  |            | <i>Mustela putorius furo</i> | + | +                               |  |  |   |  | [161,184,185,186] |
|  |  |            | <i>Mustela putorius</i>      | + | +<br>retina,<br>tapetum         |  |  |   |  | [24,112,185]      |
|  |  |            | <i>Enhydra lutris</i>        |   | +<br>retina<br>pupil<br>tapetum |  |  |   |  | [99,105,181]      |
|  |  |            | <i>Mustela vison</i>         |   | +<br>retina                     |  |  | + |  | [162,187,188]     |
|  |  |            | <i>Mustela nivalis</i>       |   | +<br>AED,<br>CD,<br>TeED        |  |  |   |  | [25,69]           |
|  |  |            | <i>Vormela peregusna</i>     |   | +<br>AED, CD<br>TeED            |  |  |   |  | [25]              |
|  |  |            | <i>Martes flavigula</i>      |   | +<br>AED, CD<br>TeED            |  |  |   |  | [25]              |
|  |  |            | <i>Martes martes</i>         |   | +<br>tapetum                    |  |  |   |  |                   |

|  |  |             |                            |  |   |                                                                  |  |   |  |                    |
|--|--|-------------|----------------------------|--|---|------------------------------------------------------------------|--|---|--|--------------------|
|  |  |             | <i>Ictonyx striatus</i>    |  | + | <i>tapetum</i>                                                   |  |   |  | [171]              |
|  |  |             |                            |  |   |                                                                  |  |   |  | [171]              |
|  |  | Procyonidae | <i>Procyon lotor</i>       |  | + | retina<br>ciliary<br>processes<br>choroid<br>AED,<br>CD,<br>TeED |  | + |  | [24,25,66,126,162] |
|  |  |             | <i>Procyon cancrivorus</i> |  | + | AED                                                              |  |   |  | [69]               |
|  |  |             | <i>Potos flavus</i>        |  | + | retina<br><i>tapetum</i>                                         |  |   |  | [24,126]           |
|  |  |             | <i>Nasua nasua</i>         |  | + | retina<br><i>tapetum</i>                                         |  |   |  | [24,126]           |
|  |  |             | <i>Bassariscus astutus</i> |  | + | AED, CD<br>TeED                                                  |  |   |  | [25]               |
|  |  |             | <i>Bassaricyon alleni</i>  |  | + |                                                                  |  |   |  | [24]               |

A – absent, AED – axial eye diameter, CD – corneal diameter, TeED – transverse (equatorial) eye diameter, + presence of the anatomical study of the chosen structure

23. Heyward, J.L.; Reynolds, B.D.; Foster, M.L.; Archibald, K.E.; Stoskopf, M.K.; Mowat, F.M. Retinal cone photoreceptor distribution in the American black bear (*Ursus americanus*). *Anat. Rec.* **2020**, *304*, 1–11.
24. Johnson, G.L. Contributions to the comparative anatomy of the mammalian eye. Chiefly based on ophthalmoscopic examination. *Philos. Trans. R. Soc. Lond. Ser. B Biol. Sci.* **1901**, *194*, 1–82.
25. Kirk, E.C. Eye morphology in catemeral lemurids and other mammals. *Folia Primatol.* **2006**, *77*, 27–49.
26. Kirbas Dogan, G.; Koral Tasci, S.; Dalga, S.; Ilhan Aksu, S. Anatomical and histological studies on the eye of brown bear (*Ursus arctos horribilis*). *Turk. J. Vet. Anim. Sci.* **2020**, *44*, 871–878.
28. Blendea, A.; Gudea, A.; Irimescu, I.; Crisan, M.; Dezdobitu, C.; Martonos, C.; Bardas, S.; Damian, A. Studies regarding comparative aspects of the splachnocranium in the brown bear (*Ursus arctos*) and lion (*Panthera leo*). *Bull. Univ. Agric. Sci. Vet. Med. Cluj Napoca Vet. Med.* **2013**, *70*, 7–15.
29. Nezami, B.; Eagdari, S. Allometric growth pattern of skull on brown bear (*Ursus arctos* Linnaeus, 1758) of the Alborz Mountain. *J. Appl. Biol. Sci.* **2014**, *8*, 52–58.
30. Mihaylov, R.; Dimitrov, R.; Raichev, E.; Kostov, D.; Stamatova-Yiovsheva, K.; Zlatanova, D.; Bivolarski, B. Morphometrical features of the head skeleton in brown bear (*Ursus arctos*) in Bulgaria. *Bulg. J. Agric. Sci.* **2013**, *19*, 331–337.
31. Yousefi, M.H. Anatomical study of the Iranian brown bear's skull (*Ursus arctos*); A case report. *Iran. J. Vet. Med.* **2016**, *10*, 237–244.
66. Heard-Booth, A.N.; Kirk, E.C. The influence of maximum running speed on eye size: A test of Leuckart's law in mammals. *Anat. Rec.* **2012**, *295*, 1053–1062.
67. Lantyer-Araujo, N.L.; Nascimento Silva, D.; Estrela-Lima, A.; Muramoto, C.; de Azevedo Libório, F.; da Silva, E.A.; Pontes Oriá, A. Anatomical, histological and computed tomography comparison of the eye and adnexa of crab-eating fox (*Cerdocyon thous*) to domestic dogs. *PLoS ONE* **2019**, *14*, e0224245.
68. Paszta, W.; Klekowska-Nawrot, J.E.; Goździewska-Harłajczuk, K. Anatomical and morphometric evaluation of the orbit, eye tunics, eyelids and orbital glands of the captive females of the South African painted dog (*Lycaon pictus pictus* Temminck, 1820) (Caniformia: Canidae). *PLoS ONE* **2021**, *16*, e0249368.
69. Kemp, A.D.; Kirk, E.C. Eye size and visual acuity influence vestibular anatomy in mammals. *Anat. Rec.* **2014**, *297*, 781–790.
72. Hughes, A. The topography of vision in mammals of contrasting life style: Comparative optics and retinal organization. In *Handbook of Sensory Physiology VII/5: The Visual System in Vertebrates*; Crescitell, F., Ed.; Springer-Verlag: Berlin, Germany, 1977; pp. 613–756.
75. Davis, R.W. Marine Mammals. In *Sensory Systems, Adaptations for an Aquatic Life*; Springer: Berlin/Heidelberg, Germany, 2019; pp. 177–217.
76. Kastelein, R.A.; Zwypfenning, R.C.V.J.; Spekreijse, H.; Dubbeldam, J.L.; Born, E.W. The Anatomy of the walrus head (*Odobenus rosmarus*). Part 3: The eyes and their function in Walrus ecology. *Aquat. Mamm.* **1993**, *19*, 61–92.
83. Mass, A.M.; Supin, A.Y. Adaptive features of aquatic mammals' eye. *Anat. Rec.* **2007**, *290*, 701–715.
84. Merindano, M.D.; Costa, J.; Canals, M.; Potau, J.M.; Ruano, D. A comparative study of Bowman's layer in some mammals: Relationships with other constituent corneal structures. *Eur. J. Anat.* **2002**, *6*, 133–139.
85. Nautscher, N.; Baurer, A.; Steffl, M.; Amselgruber, W.M. Comparative morphological evaluation of domestic animal cornea. *Vet. Ophthalmol.* **2016**, *19*, 297–304.
86. Merindano, M.D.; Canals, M.; Potau, J.M.; Costa, J.; Ruano, D. Morphometrical features of the corneal epithelium in mammals. *Anat. Histol. Embryol.* **1998**, *27*, 105–110.
87. Renzo, R. Parâmetros oftálmicos em cachorro-do-mato (*Cerdocyon thous*, Linnaeus, 1766). Ph.D. Thesis. Universidade Estadual Paulista–UNESP Faculdade De Ciências Agrárias E Veterinárias Câmpus De Jaboticabal: São Paulo, Brazil, 2015.
89. Mass, A.M.; Supin, A.Y. Eye Optics in Semiaquatic Mammals for Aerial and Aquatic Vision. *Brain Behav. Evol.* **2018**, *92*, 117–124.
91. Miller, S.; Whelan, N.; Hope, K.; Nogueira Marmolejo, M.G.; Knightly, F.; Sutherland-Smith, M.; Rivera, S. Survey of clinical ophthalmic disease in the giant panda (*Ailuropoda Melanoleuca*) among North American Zoological Institutions. *J. Zoo Wildl. Med.* **2019**, *50*, 837–844.
92. Welsch, U.; Ramdohr, S.; Riedelsheimer, B.; Hebel, R.; Eisert, R.; Plötz, J. Microscopic anatomy of the eye of the deep-diving Antarctic Weddell seal (*Leptonychotes weddellii*). *J. Morphol.* **2001**, *248*, 165–174.
96. Malmström, T.; Kröger, R.H.H. Pupil shapes and lens optics in the eyes of terrestrial vertebrates. *J. Exp. Biol.* **2006**, *209*, 18–25.
97. Carvalho, C.M.; Rodarte-Almeida, A.C.V.; Beanes, A.S.; Machado, M.T.S.; Galera, P.D. Ophthalmic contribution to assessing eyes of the two neotropical canids: *Cerdocyon thous* and *Chrysocyon brachyurus*. *Vet. Ophthalmol.* **2020**, *23*, 460–471.



103. Sivak, J.G.; Howland, H.C.; West, J.; Weerheim, J. The eye of the hooded seal *Cystophora cristata*, in air and water. *J. Comp. Physiol. A* **1989**, *165*, 771–777.
104. West, J.A.; Sivak, J.G.; Murphy, C.J.; Kovacs, K.M. A comparative study of the anatomy of the iris and ciliary body in aquatic mammals. *Can. J. Zool.* **2011**, *69*, 2594–2607.
106. Braekevelt, C.R. Fine structure of the tapetum cellulosum of the Grey seal (*Halichoerus grypus*). *Acta Anat.* **1986**, *127*, 81–87.
107. Chijiwa, T.; Ishibashi, T.; Inomata, H. Histological study of choroidal melanocytes in animals with tapetum lucidum cellulosum. *Graefe's Arch. Clin. Exp. Ophthalmol.* **1990**, *228*, 161–168.
111. Ollivier, F.J.; Samuelson, D.A.; Brooks, D.E.; Lewis, P.A.; Kallberg, M.E.; Komáromy, A.M. Comparative morphology of the tapetum lucidum (among selected species). *Vet. Ophthalmol.* **2004**, *7*, 11–22.
113. Yamaue, Y.; Hosaka, Y.Z.; Uehara, M. Macroscopic and Histological variations in the cellular tapetum in dogs. *Anatomy* **2014**, *76*, 1099–1103.
115. Malkemper, E.P.; Peichl, L. Retinal photoreceptor and ganglion cell types and topographies in the red fox (*Vulpes vulpes*) and Arctic fox (*Vulpes lagopus*). *J. Comp. Neurol.* **2018**, *526*, 2078–2098.
116. Mass, A.M. Localization of the high-resolution area in the ganglion cell layer of the Baikal seal *Pusa sibirica* Gm. 1788. *Dokl. Biol. Sci.* **2016**, *467*, 51–54.
117. Mass, A.M.; Supin, A.Y. Retinal topography of the harp seal *Pagophilus groenlandicus*. *Brain Behav. Evol.* **2003**, *62*, 212–222.
118. Mass, A.M.; Supin, A.Y. Retinal ganglion cell layer of the Caspian seal *Pusa caspica*: Topography and localization of the high-resolution area. *Brain Behav. Evol.* **2010**, *76*, 144–153.
119. Mass, A.M.; Supin, A.Y. Retinal ganglion cell topography and retinal resolution in the Baikal seal (*Pusa sibirica*). *Brain Behav. Evol.* **2016**, *88*, 59–67.
121. Landau, D.; Dawson, W.W. The histology of retinas from the pinnipedia. *Vis. Res.* **1970**, *10*, 691–702.
122. Nagy, A.R.; Ronald, K. A light and electronmicroscopic study of the structure of the retina of the harp seal, *Pagophilus groenlandicus* (Erxleben, 1777). *Rapp. P.-v. Réun. Cons. Int. Explor. Mer.* **1975**, *169*, 92–96.
127. Zuoliang, F. Comparative anatomical studies on the skeleton of arctic foxes. *J. Econ. Anim.* **2004**, *8*, 80–84.
130. Hidaka, S.; Matsumoto, M.; Hiji, H.; Ohsako, S.; Nishinakagawa, H. Morphology and morphometry of skulls of Raccoon dogs *Nyctereutes procyonoides* and Badgers *Meles meles*. *J. Vet. Med. Sci.* **1998**, *60*, 161–167.
131. Debey, L.B. Osteological correlates and phylogenetic analysis of deep diving in living and extinct pinnipeds: What good are big eyes? *Mar. Mammal Sci.* **2013**, *29*, 48–83.
132. Kastelein, R.A.; Gerrits, N.M. The anatomy of the walrus head (*Odobenus rosmarus*). Part 1. The skull. *Aquat. Mamm.* **1990**, *16*, 101–119.
135. Constantinescu, G.M.; Moore, C.P. Clinical anatomy of the eyelids for small animal practitioners. *Wien. Tierärztliche Mon.* **1998**, *85*, 229–232.
138. Gulland, F.M.D.; Dierauf, L.A.; Withman, K.L. *CRC Handbook of Marine Mammal Medicine*, 3rd ed.; CRC Press: Boca Raton, FL, USA; Taylor & Francis Inc: London, UK, 2018; pp. 517–536.
139. Kelleher Davis, R.; Doane, M.G.; Knop, E.; Knop, N.; Dubielzig, R.R.; Colitz, C.M.H.; Argüeso, P.; Sullivan, D.A. Characterization of ocular gland morphology and tear composition of pinnipeds. *Vet. Ophthalmol.* **2013**, *16*, 269–275.
143. Moore, C.P.; Wilsman, N.J.; Nordheim, E.V.; Majors, L.J.; Colier, L.L. 1987. Density and distribution of canine conjunctival goblet cells. *Investig. Ophthalmol. Vis. Sci.* **1987**, *28*, 1925–1932.
150. Cazacu, P. Researches Concerning the Morphology of the Nictitating Gland in Dogs. PhD Thesis. IASI: Darmstadt, Germany, 2010.
151. Park, S.A.; Taylor, K.T.; Zwingerberger, A.L.; Toupadakis, C.h.A.; Marfurt, C.F.; Good, K.L.; Murphy, C.J. Gross anatomy and morphometric evaluation of the canine and third eyelid glands. *Vet. Ophthalmol.* **2016**, *19*, 230–236.
152. Cabral, V.P.; Laus, J.L.; Dagli, M.L.Z.; PereiraIvia, G.T.; Talieri, I.C.; Monteiro, E.R.; Mamede, F.V. 2005. Canine lacrimal and third eyelid superficial glands macroscopic and morphometric characteristics. *Cienc. Rural.* **2005**, *35*, 391–397.
158. Goller, T.; Weyrauch, K.D. 1993. The conjunctival epithelium of the dogs. *Ann. Anat.* **1993**, *175*, 127–134.
163. Owen, R. On the anatomy of the Walrus. *Proc. Zool. Soc. Lond.* **1853**, *23*, 103–106.
164. Pütter, A. Die Augen der Wassersäugethiere (in German). *Zool. Jahrb. Jena Gustaf. Fisher Verlag.* **1903**, *17*, 97–402.

165. El-naseery, N.I.; El-behery, E.I.; El-Ghazali, H.M.; El-Hady, E. The structural characterization of the lacrimal gland in the adult dog (*Canis familiaris*). *Benha Vet. Medical J.* **2016**, *31*, 106–116.
166. Martin, C.h.L.; Munnell, J.; Kaswan, R. Normal ultrastructure and histochemical characteristics of the canine lacrimal gland. *Am. J. Vet. Res.* **1988**, *49*, 1566–1572.
167. Shaker, M.M.; Walaa, F.O.A. Anatomical and histological study of the lacrimal gland of the adult male dog (*Canis familiaris*). *Glob. J. Bio-Sci. Biotechnol.* **2016**, *5*, 520–524.
168. Zwingenberger, A.L.; Park, A.A.; Murphy, C.J. Computed tomographic imaging characteristics of the normal canine lacrimal glands. *BMC Vet. Res.* **2014**, *10*, 116.
170. Igado, O.O. Skull typology and morphometric of the Nigerian local dog (*Canis lupus familiaris*). *Niger J. Physiol. Sci.* **2017**, *32*, 153–158.
171. Johnson, G.L. Ophthalmoscopic studies on the eyes of mammals. *Philos. Trans. R. Soc. Lond. Ser. B Biol. Sci.* **1968**, *254*, 207–220.
172. Mowat, F.M.; Petersen-Jones, S.M.; Williamson, H.; Williams, D.L.; Luthert, P.J.; Ali, R.R.; Bainbridge, J.W. Topographical characterization of cone photoreceptors and the area centralis of the canine retina. *Mol. Vis.* **2008**, *14*, 2518–2527.
173. Schmitt, E.; Wallace, S. Shape change and variation in the cranial morphology of wild canids (*Canis lupus*, *Canis latrans*, *Canis rufus*) compared to domestic dogs (*Canis familiaris*) using geometric morphometrics. *Int. J. Osteoarcheology* **2014**, *24*, 42–50.
174. Salguero, R.; Johnson, V.; Williams, D.; Hartley, C.; Holmes, M.; Dennis, R.; Herrtage, M. CT dimensions, volume and densities of normal canine eyes. *Vet. Rec.* **2015**, *176*, 386.
175. Renzo, R.; Aldrovani, M.; Crivelaro, R.M.; Thiesen, R.; de Barros Sobrinho, A.A.F.; Balthazar da Silveira, C.P.; Garcia, A.P.; Campos, G.C.S.; Werther, K.; Laus, J.L. The eye of crab-eating fox (*Cerdocyon thous*): Anatomical characteristics and normative values of the selected diagnostic tests, morphometry of corneal tissue, and arrangements of corneal stromal collagen fibres. *J. Zoo Wildl. Med.* **2020**, *51*, 280–289.
176. Segura, V.; Prevosti, F. A quantitative approach of the cranial ontogeny of *Lycalopex culpaeus* (Carnivora: Canidae). *Zoomorphology* **2012**, *131*, 79–92.
177. Rexford, D. The lens as an indicator of age in the gray fox. *J. Mammology* **1961**, *42*, 109–111.
178. Peichl, L.; Dubielzig, R.R.; Kubber-Heiss, A.; Schubert, C.; Ahnelt, P.K. Retinal cone types in brown bears and the polar bear indicate dichromatic color vision (abstract). *Investig. Ophthalmol. Vis. Sci.* **2005**, *46*, 4539.
179. Mass, A.M.; Supin, A.Y. Peak density, size and regional distribution of ganglion cells in the retina of the fur seal *Callorhinus ursinus*. *Brain Behav. Evol.* **1992**, *39*, 69–76.
180. Turner, E.C.; Sawyer, E.K.; Kaas, J.H. Optic nerve, superior colliculus, visual thalamus, and primary visual cortex of the northern elephant seal (*Mirounga angustirostris*) and California sea lion (*Zalophus californianus*). *J. Comp. Neurol.* **2017**, *525*, 2109–2132.
181. Ninomiya, H.; Imamura, E.; Inomata, T. Comparative anatomy of the ophthalmic rete and its relationship to ocular blood flow in three of marine mammal. *Vet. Ophthalmol.* **2014**, *17*, 100–105.
182. Levenson, D.H.; Schusterman, R.J. Dark adaptation and visual sensitivity in shallow and deep diving pinnipeds. *Mar. Mamm. Sci.* **1999**, *15*, 1303–1313.
183. Hanke, F.D.; Hanke, W.; Scholtyssek, C.; Dehnhardt, G. Basic mechanisms in pinniped vision. *Exp. Brain Res.* **2009**, *199*, 299–311.
184. Ye, Y.; Doung, T.A.D.; Saito, K.; Shinmyo, Y.; Ichikawa, Y.; Higashide, T.; Kagami, K.; Fujiwara, H.; Sugiyama, K.; Kawasaki, H. Visualization of the retina in intact eyes of mice and ferrets using a tissue clearing method. *Transl. Vis. Sci. Technol.* **2020**, *9*, 1–9.
185. He, T.; Friede, H.; Kiliadis, S. Macroscopic and roentgenographic anatomy of the skull of the ferret (*Mustela putorius furo*). *Laboratory Anim.* **2002**, *36*, 86–96.
186. Hernandez-Guerra, A.M.; Rodilla, V.; Lopez-Murcia, M.M. Ocular biometry in the adult anesthetized ferret (*Mustela putorius furo*). *Vet. Ophthalmol.* **2007**, *10*, 50–52.
187. Tjälve, H.; Frank, A. Tapetum lucidum in the pigmented and albino ferret. *Exp. Eye Res.* **1984**, *38*, 341–351.
188. Braekevelt, C.R. Fine structure of the retinal epithelium and tapetum lucidum of the ranch mink *Mustela vison*. *Acta Anat.* **1989**, *135*, 296–302.
